# Supplementary material for: Epigenetic Stress and Long-Read cDNA Sequencing of Sunflower (Helianthus annuus L.) Revealed the Origin of the Plant Retrotranscriptome
Source: MDPI journal article supplement (doi:10.3390/plants11243579), 2022-12-19
Supplement: s1 [file s1]

**Supplementary Table S1.** Genomic features and encoded retrotransposon domains of 56 expressed RTEs.

| Chromosome | Start     | End       | RATTLE_id     | Length | Reads count | Superfamily | Clade     | RNA_encodes | Classification |
|------------|-----------|-----------|---------------|--------|-------------|-------------|-----------|-------------|----------------|
| 5          | 111041853 | 111048190 | cluster_10061 | 2095   | 21          | Copia       | Tork      | GAG         | nonLTR-RTEs    |
| 6          | 15948848  | 15952707  | cluster_4633  | 1682   | 18          | Copia       | TAR       | GAG         | nonLTR-RTEs    |
| 10         | 10198869  | 10201567  | cluster_7519  | 1391   | 49          | Gypsy       | Retand    | GAG         | nonLTR-RTEs    |
| 10         | 26092473  | 26093776  | cluster_8141  | 1362   | 6           | Copia       | Ivana     | RT-RH       | LTR-RTEs       |
| 11         | 115012818 | 115016428 | cluster_399   | 2950   | 92          | Copia       | Ivana     | RT-RH       | LTR-RTEs       |
| 11         | 189552291 | 189552871 | cluster_24693 | 1246   | 57          | Copia       | Ale       | GAG         | LTR-RTEs       |
| 12         | 62833938  | 62881511  | cluster_8028  | 1947   | 26          | Copia       | Ivana     | RT-RH       | LTR-RTEs       |
| 16         | 2368393   | 2392850   | cluster_10355 | 2030   | 73          | Copia       | Ale       | GAG         | LTR-RTEs       |
| 16         | 163915120 | 163916719 | cluster_14216 | 1596   | 13          | Copia       | Ale       | GAG         | LTR-RTEs       |
| 2          | 123303689 | 123304708 | cluster_11750 | 1807   | 14          | Copia       | Ale       | GAG         | LTR-RTEs       |
| 2          | 166928135 | 166930593 | cluster_6420  | 2414   | 12          | Copia       | Ale       | GAG         | LTR-RTEs       |
| 2          | 167901822 | 167904173 | cluster_6901  | 3072   | 146         | Copia       | Ale       | GAG         | LTR-RTEs       |
| 4          | 90859498  | 90859655  | cluster_14048 | 1631   | 33          | Copia       | Ale       | GAG         | LTR-RTEs       |
| 7          | 143032959 | 143034553 | cluster_16611 | 1484   | 12          | Copia       | Ale       | GAG         | LTR-RTEs       |
| 8          | 14172378  | 14173905  | cluster_18395 | 1462   | 33          | Copia       | Ale       | GAG         | LTR-RTEs       |
| 9          | 30155070  | 30156896  | cluster_3859  | 2661   | 63          | Copia       | Ivana     | RT-RH       | LTR-RTEs       |
| 15         | 33119383  | 33125110  | cluster_3551  | 3792   | 41          | Copia       | Ale       | GAG-RH-RT   | LTR-RTEs       |
| 13         | 58833877  | 58841753  | cluster_5423  | 2512   | 25          | Gypsy       | Tekay     | GAG         | LTR-RTEs       |
| 13         | 163758439 | 163761477 | cluster_3681  | 3003   | 181         | Copia       | Angela    | GAG         | LTR-RTEs       |
| 15         | 51651995  | 51654573  | cluster_1380  | 2310   | 66          | Copia       | Ale       | GAG         | LTR-RTEs       |
| 9          | 154617567 | 154619891 | cluster_7336  | 2456   | 80          | Gypsy       | Galadriel | INT-RT-RH   | LTR-RTEs       |
| 11         | 178837568 | 178838427 | cluster_25237 | 932    | 19          | Copia       | Ale       | RT          | LTR-RTEs       |
| 14         | 32405500  | 32408839  | cluster_6489  | 2414   | 42          | Copia       | Ale       | GAG         | LTR-RTEs       |
| 1          | 49990110  | 49991592  | cluster_14679 | 1537   | 13          | Copia       | Ale       | GAG         | nonLTR-RTEs    |
| 2          | 21028153  | 21029912  | cluster_8675  | 2137   | 56          | Copia       | GAG       | GAG         | nonLTR-RTEs    |
| 16         | 171984474 | 171986007 | cluster_7578  | 2297   | 27          | Copia       | Ale       | AP          | nonLTR-RTEs    |
| 7          | 40963201  | 41214845  | cluster_23204 | 1172   | 113         | Gypsy       | Tekay     | AP          | nonLTR-RTEs    |
| 1          | 86032605  | 86035876  | cluster_7965  | 2138   | 7           | Gypsy       | Athila    | GAG         | nonLTR-RTEs    |
| 10         | 112431674 | 112433398 | cluster_2193  | 3050   | 141         | Copia       | Tork      | GAG         | nonLTR-RTEs    |

|    |           |           |               |      |     |       |        |            |             |
|----|-----------|-----------|---------------|------|-----|-------|--------|------------|-------------|
| 1  | 131160102 | 131160727 | cluster_31455 | 711  | 11  | Copia | Ale    | invalidGAG | nonLTR-RTEs |
| 13 | 117354054 | 117355489 | cluster_15177 | 1509 | 58  | Copia | Ale    | GAG        | nonLTR-RTEs |
| 17 | 88291590  | 88293112  | cluster_17119 | 1553 | 22  | Copia | Ale    | GAG        | nonLTR-RTEs |
| 3  | 123534127 | 123535158 | cluster_6566  | 2531 | 153 | Copia | SIRE   | GAG        | nonLTR-RTEs |
| 9  | 59099804  | 59101252  | cluster_1121  | 3050 | 18  | Copia | Ale    | GAG        | nonLTR-RTEs |
| 5  | 87251873  | 87252902  | cluster_16977 | 1532 | 196 | Copia | Ale    | invalidGAG | nonLTR-RTEs |
| 6  | 109552656 | 109553819 | cluster_7388  | 2099 | 19  | Copia | Ale    | GAG        | nonLTR-RTEs |
| 10 | 150494674 | 150497333 | cluster_2221  | 3396 | 358 | Copia | Ale    | GAG        | nonLTR-RTEs |
| 14 | 160768694 | 160771069 | cluster_6018  | 2436 | 29  | Gypsy | Athila | INT-RH     | nonLTR-RTEs |
| 10 | 117711306 | 117712310 | cluster_23187 | 1123 | 13  | Copia | Ale    | RH         | nonLTR-RTEs |
| 13 | 98927461  | 98928421  | cluster_22524 | 1073 | 14  | Copia | Alesia | RH         | nonLTR-RTEs |
| 4  | 14113081  | 14114534  | cluster_15782 | 1522 | 140 | Gypsy | Reina  | RT         | nonLTR-RTEs |
| 6  | 45198600  | 45200565  | cluster_8568  | 2126 | 17  | Copia | Ivana  | RT-RH      | nonLTR-RTEs |
| 13 | 2243236   | 2244859   | cluster_13124 | 1601 | 10  | Copia | Ivana  | GAG        | TR-RTEs     |
| 12 | 10211802  | 10215117  | cluster_10335 | 1852 | 8   | Gypsy | Tekay  | GAG        | TR-RTEs     |
| 1  | 42269505  | 42270084  | cluster_12205 | 1683 | 12  | Copia | Ale    | GAG        | TR-RTEs     |
| 9  | 154551837 | 154553104 | cluster_8430  | 2444 | 30  | Copia | Ale    | GAG        | TR-RTEs     |
| 3  | 133060702 | 133062271 | cluster_4322  | 3026 | 138 | Gypsy | Tekay  | GAG        | TR-RTEs     |
| 4  | 9198319   | 9200044   | cluster_10766 | 1866 | 20  | Copia | Ivana  | GAG        | TR-RTEs     |
| 11 | 129039178 | 129042115 | cluster_7941  | 3012 | 29  | Copia | Ale    | RH         | TR-RTEs     |
| 12 | 128632969 | 128634187 | cluster_6807  | 1350 | 9   | Copia | Ale    | RT         | TR-RTEs     |
| 2  | 22602400  | 22603434  | cluster_11455 | 2097 | 181 | Copia | Bianca | INT-RT     | TR-RTEs     |
| 8  | 5635039   | 5636943   | cluster_9729  | 1969 | 6   | Copia | Ivana  | RT-RH      | TR-RTEs     |
| 11 | 173696772 | 173698954 | cluster_6221  | 1777 | 40  | Copia | Ale    | GAG        | LTR-RTEs    |
| 10 | 30308737  | 30310622  | cluster_11705 | 1821 | 9   | Copia | Ale    | invalidGAG | LTR-RTEs    |
| 3  | 55383993  | 55393222  | cluster_25987 | 1254 | 6   | Gypsy | Tekay  | GAG        | LTR-RTEs    |
| 12 | 90097445  | 90098458  | cluster_18084 | 1317 | 7   | Copia | Ale    | INT        | LTR-RTEs    |

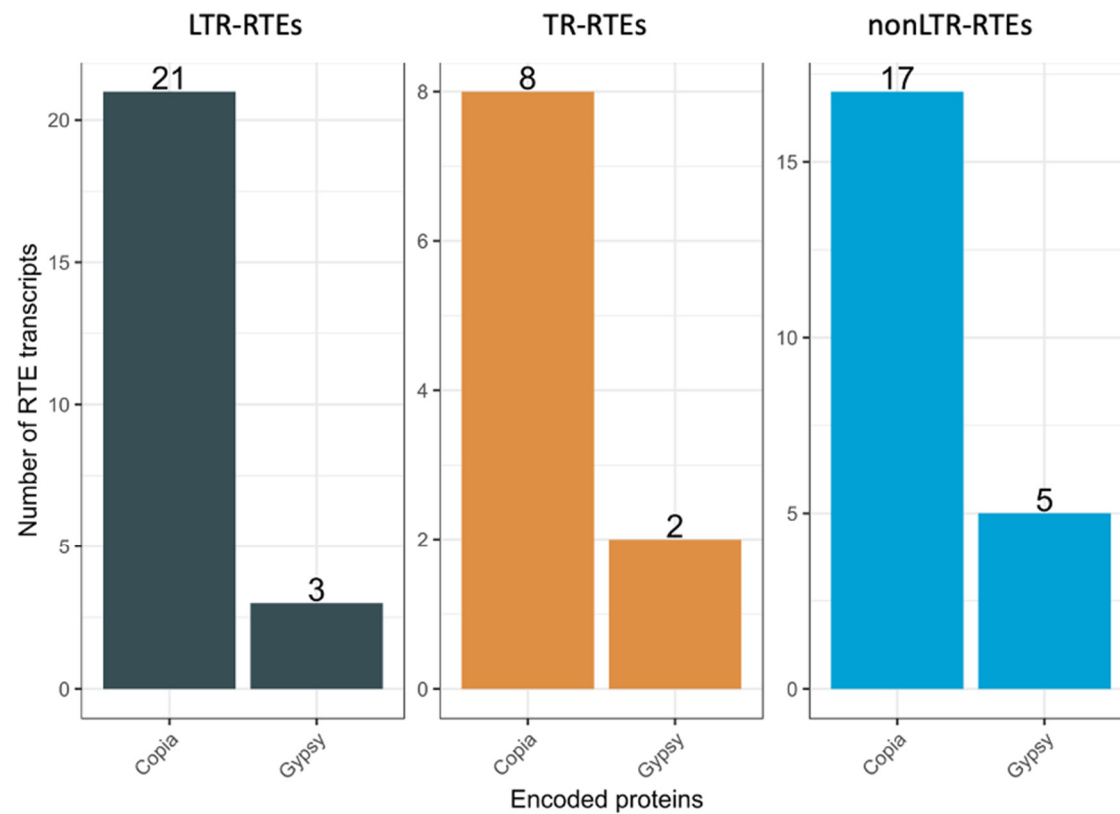

**Supplementary Figure S1.** Bar plot showing the number of RTE transcripts of different categories expressed from Ty1/Copia and Ty3/Gypsy.

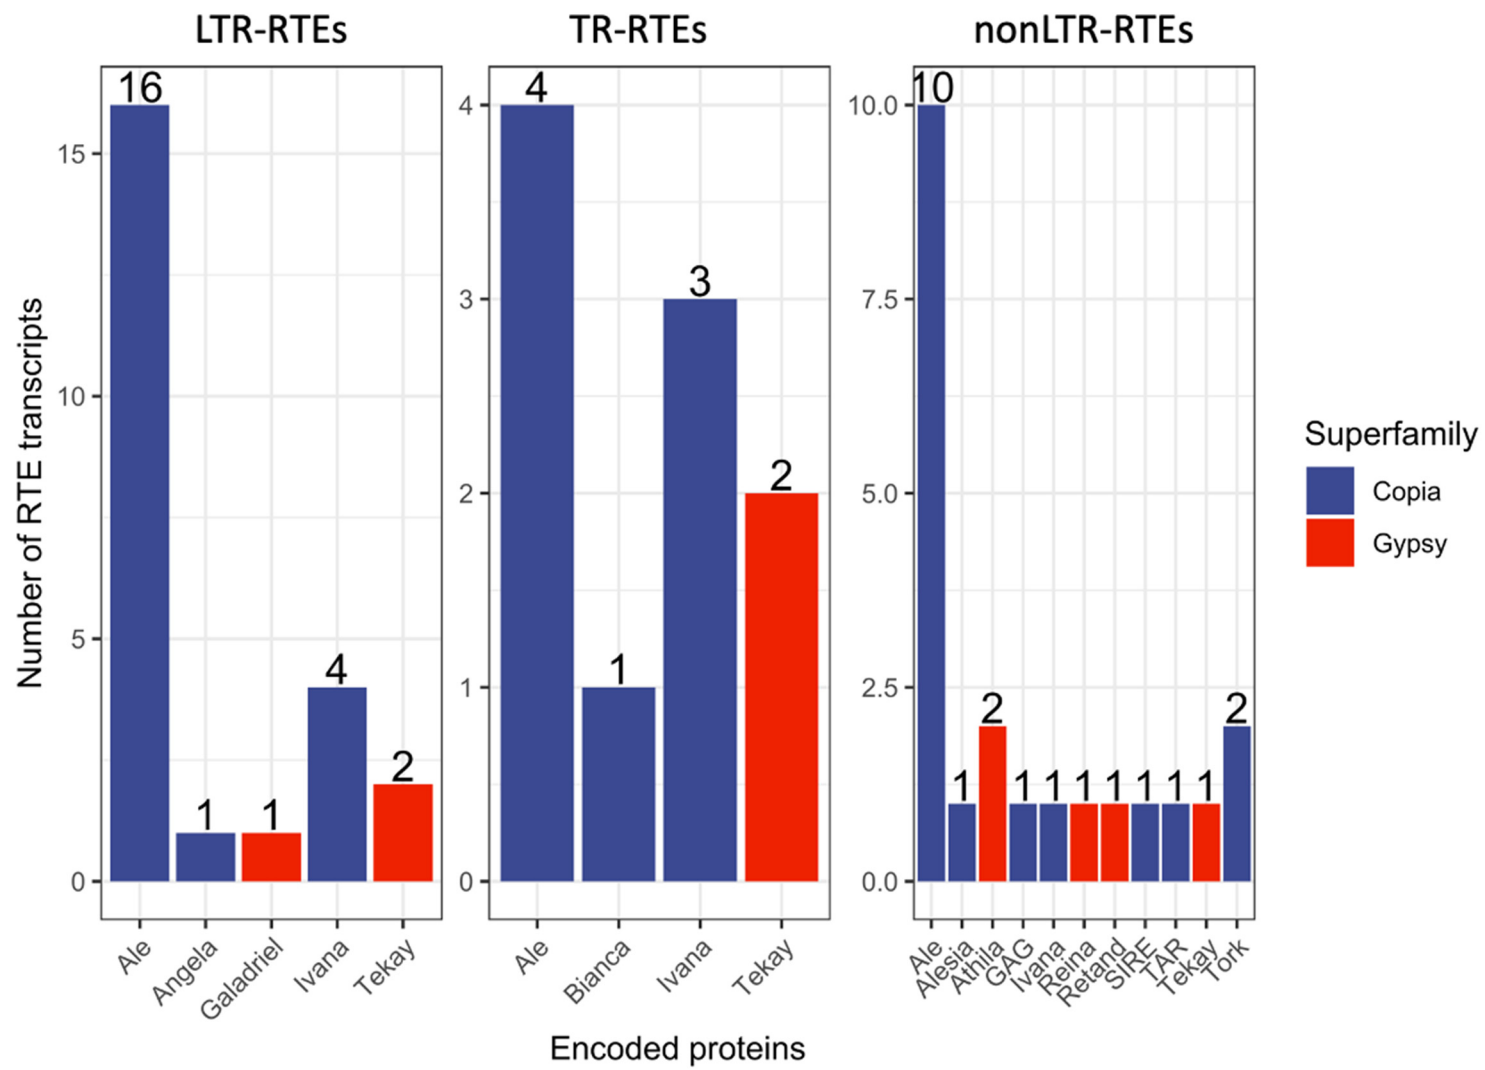

**Supplementary Figure S2.** Bar plot showing the number of RTE transcripts of different categories expressed from distinct lineages of Ty1/Copia and Ty3/Gypsy.

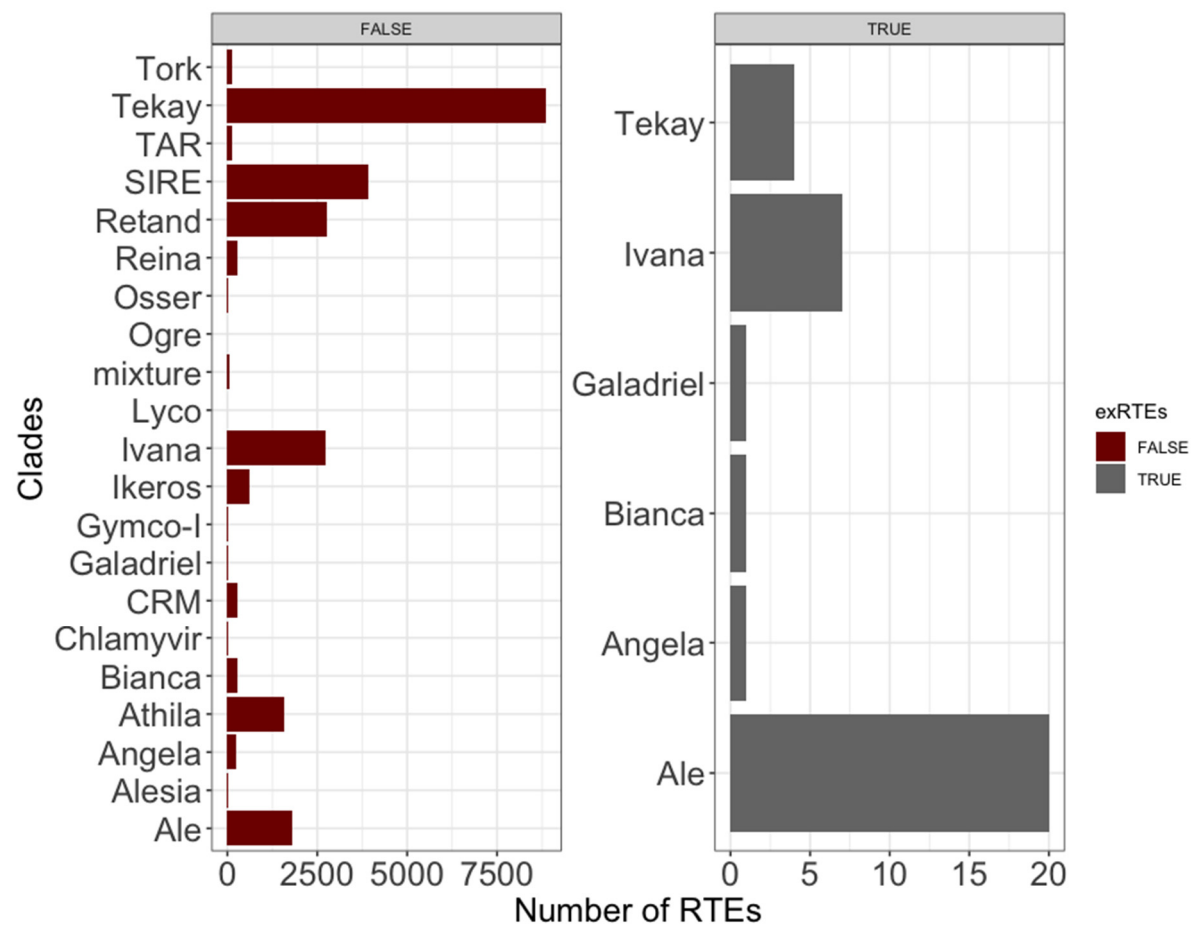

**Supplementary Figure S3.** Bar plot showing the number of RTEs of different categories expressed from distinct lineages of LTR retrotransposons. Left and right plots correspond to the RTEs identified in the whole genome assembly and expressed RTEs, respectively.



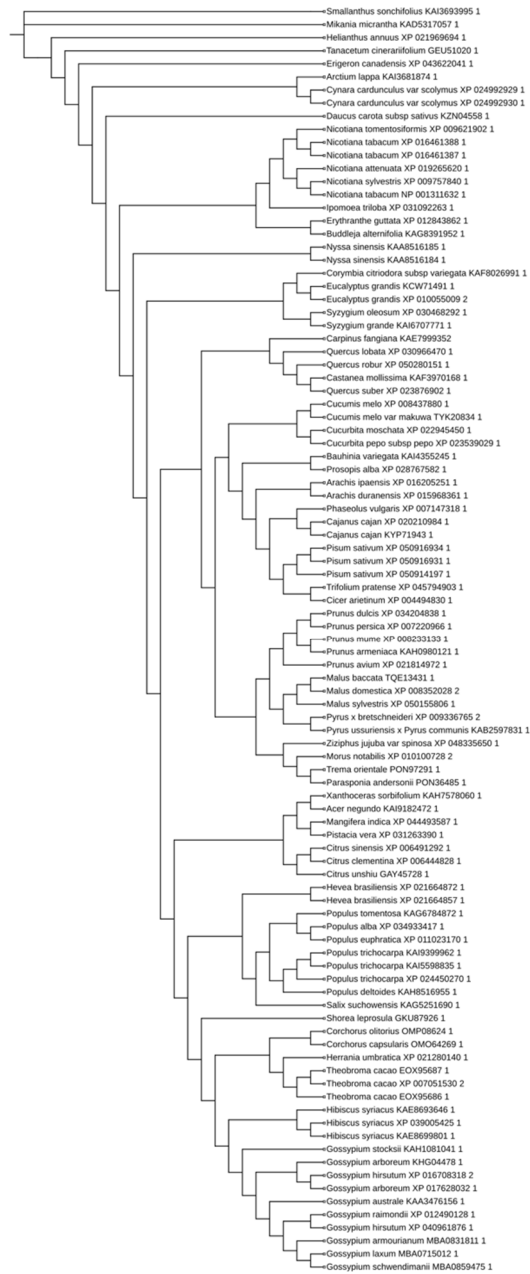

**Supplementary Figure S5. Phylogenetic tree based on blastp hits sequences alignment of HadGAG2 homologs (iTOL, NGPhylogeny.fr)**
